# Supplementary material for: Transition-Metal-Catalyzed Diarylation of Isocyanides with Triarylbismuthines for the Selective Synthesis of Imine Derivatives
Source: MDPI journal article supplement (doi:10.3390/ma14154271), 2021-07-30
Supplement: s1 [file s1]

# Transition-Metal-Catalyzed Diarylation of Isocyanides with Triarylbi-muthines for the Selective Synthesis of Imine Derivatives

Shintaro Kodama <sup>1</sup>, Yuki Yamamoto <sup>1</sup>, Yohsuke Kobiki <sup>1</sup>, Hitomi Matsubara <sup>1</sup>, Cong Chi Tran <sup>1</sup>, Shin-ichi Kawaguchi <sup>2,\*</sup>, Akihiro Nomoto <sup>1</sup> and Akiya Ogawa <sup>1,\*</sup>

<sup>1</sup> Department of Applied Chemistry, Graduate School of Engineering, Osaka Prefecture University, 1-1 Gakuen-cho, Nakaku, Sakai, Osaka 599-8570, Japan; skodama@chem.osakafu-u.ac.jp (S.K.); syb02137@edu.osakafu-u.ac.jp (Y.Y.); yohsuke.kobiki@gmail.com (Y.K.); sv108059@edu.osakafu-u.ac.jp (H.M.); mz105131@edu.osakafu-u.ac.jp (C.C.T.); nomoto@chem.osakafu-u.ac.jp (A.N.)

<sup>2</sup> Center for Education and Research in Agricultural Innovation, Faculty of Agriculture, Saga University, 152-1 Shonan-cho, Karatsu, Saga 847-0021, Japan

\* Correspondence: skawa@cc.saga-u.ac.jp (S.K.); ogawa@chem.osakafu-u.ac.jp (A.O.)

**Citation:** Kodama, S.; Yamamoto, Y.; Kobiki, Y.; Matsubara, H.; Tran, C.C.; Kawaguchi, S.-i.; Nomoto, A.; Ogawa, A. Transition-Metal-Catalyzed Diarylation of Isocyanides with Triarylbi-muthines for the Selective Synthesis of Imine Derivatives. *Materials* **2021**, *14*, 4271. <https://doi.org/10.3390/ma14154271>

Academic Editor(s): Grzegorz Młostóń

Received: 1 July 2021

Accepted: 28 July 2021

Published: 30 July 2021

**Publisher's Note:** MDPI stays neutral with regard to jurisdictional claims in published maps and institutional affiliations.

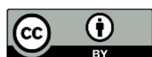

**Copyright:** © 2021 by the authors. Licensee MDPI, Basel, Switzerland. This article is an open access article distributed under the terms and conditions of the Creative Commons Attribution (CC BY) license (<http://creativecommons.org/licenses/by/4.0/>).

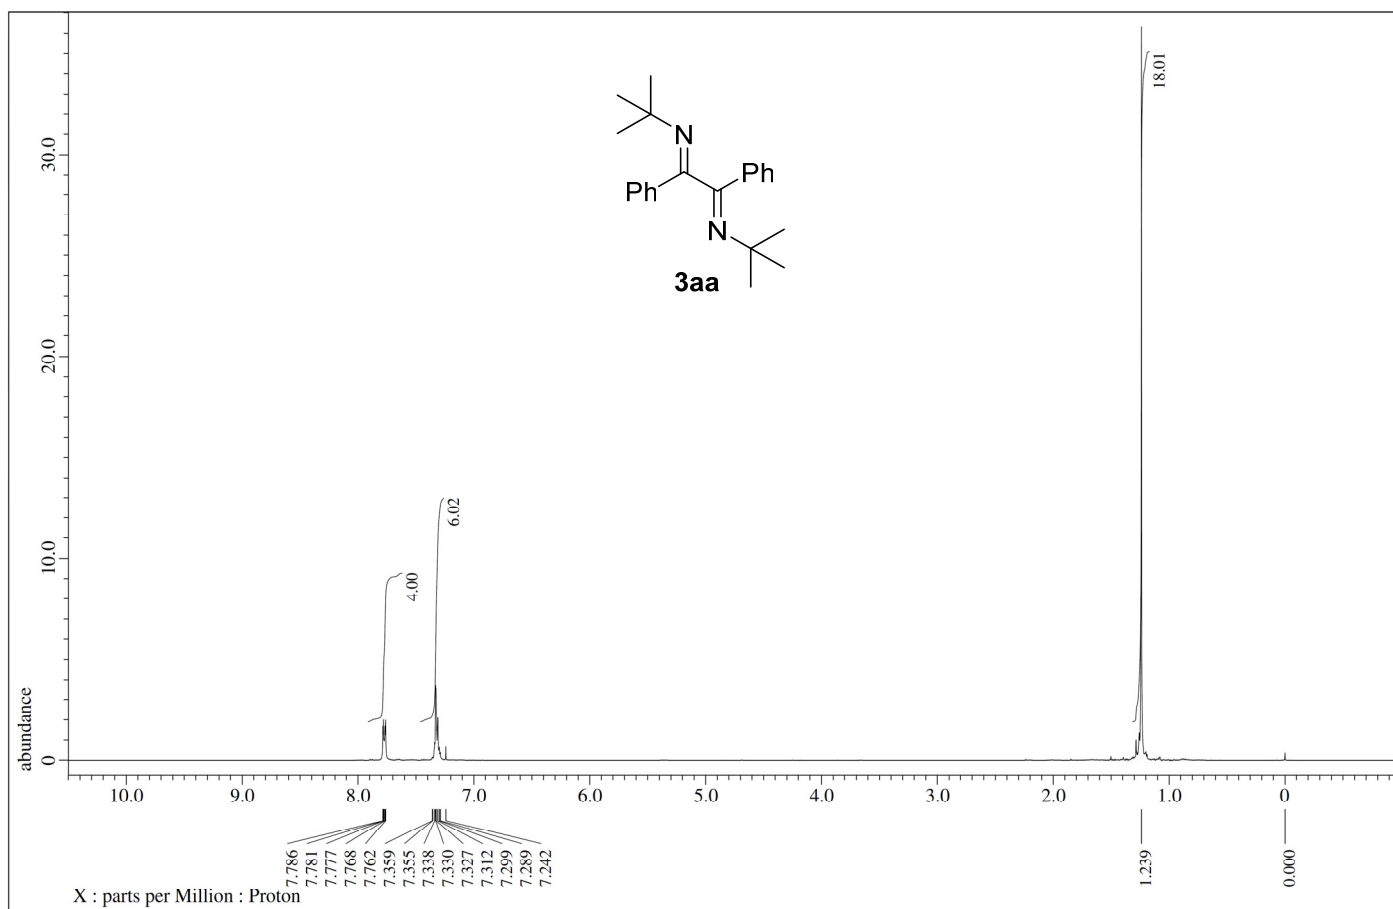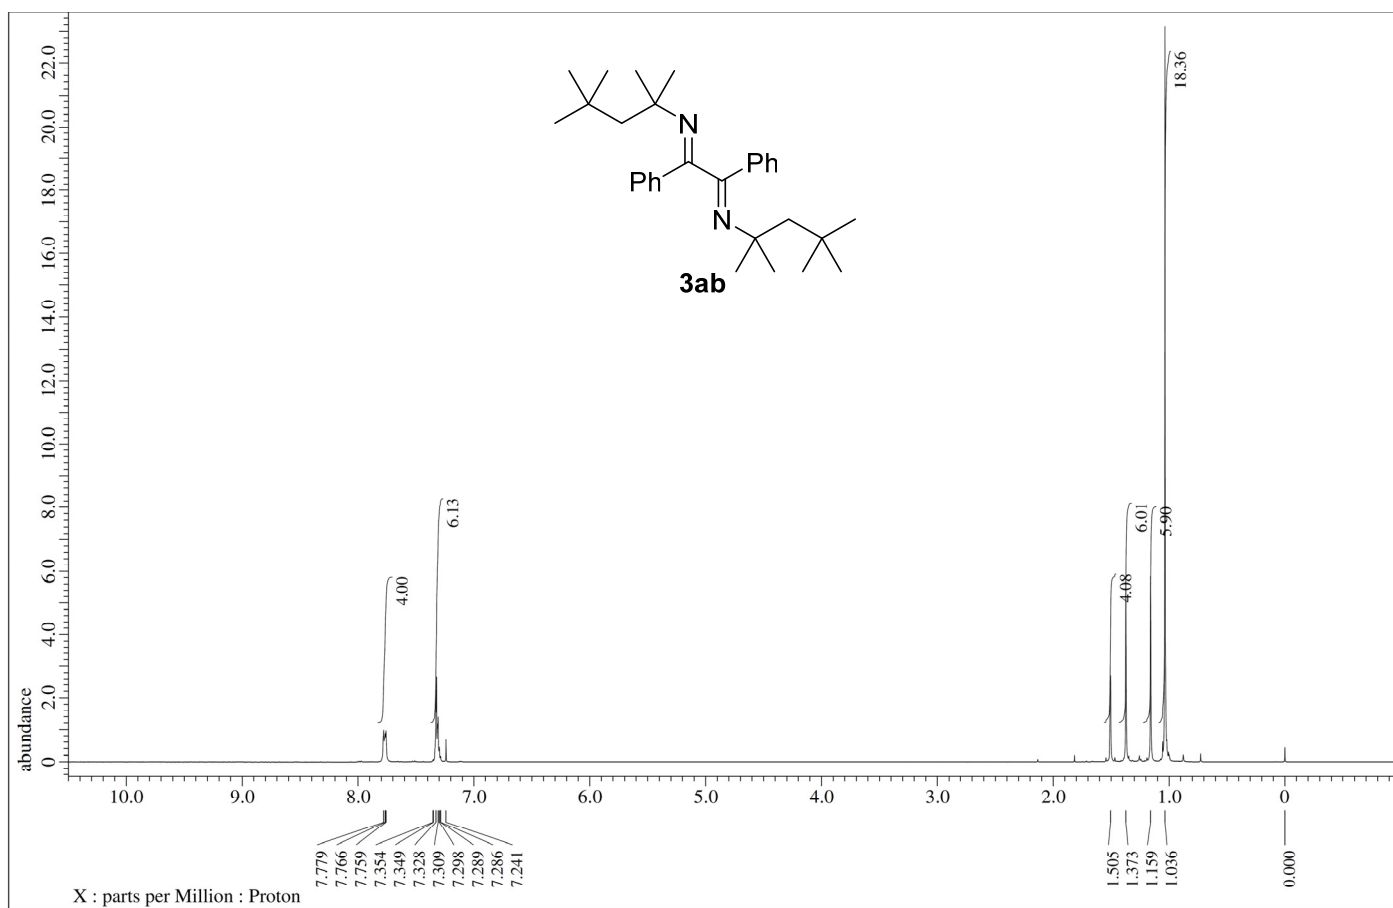

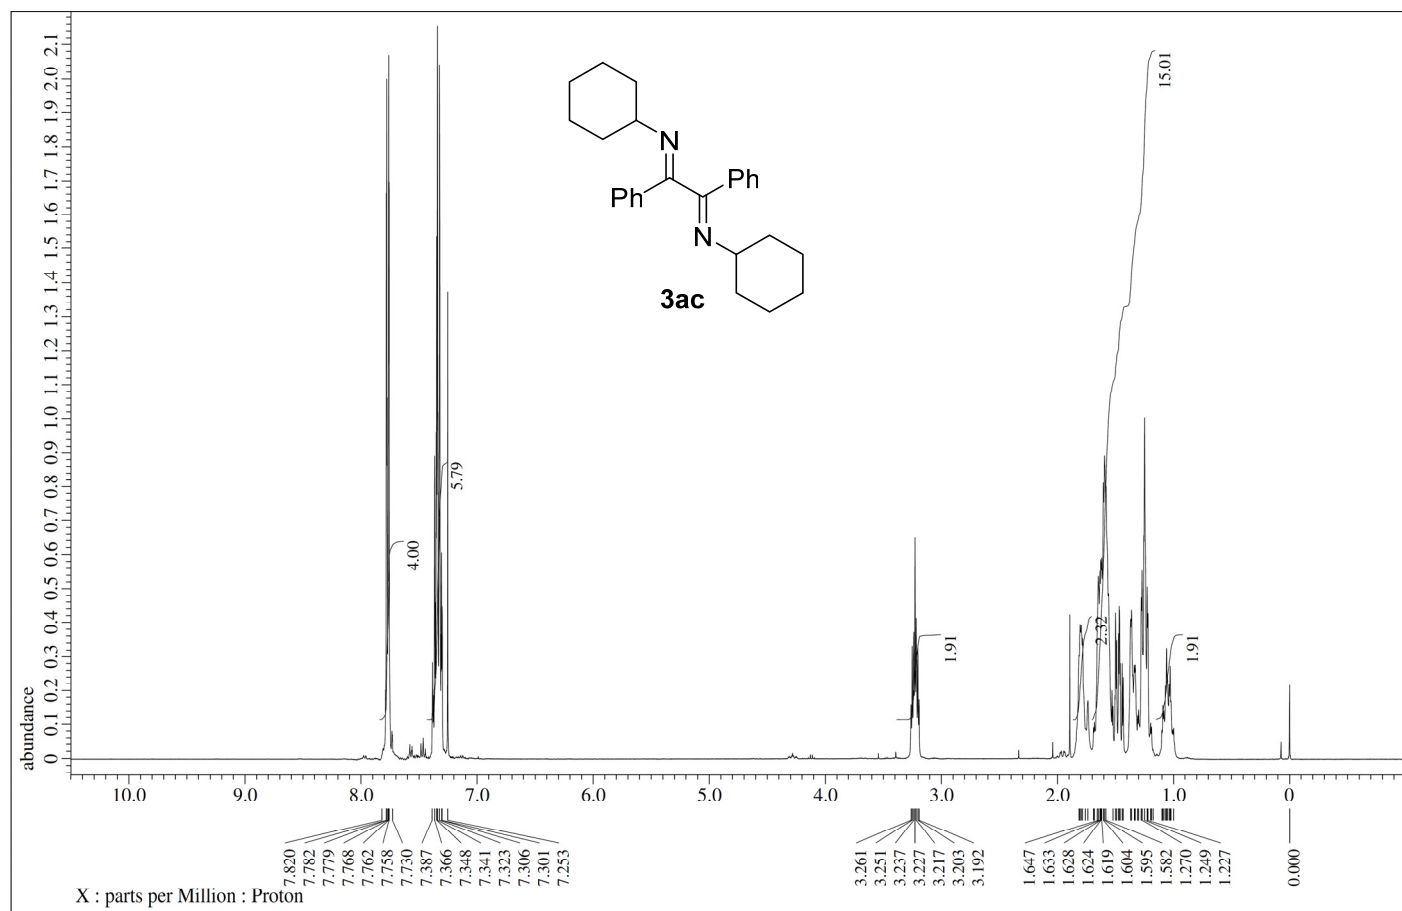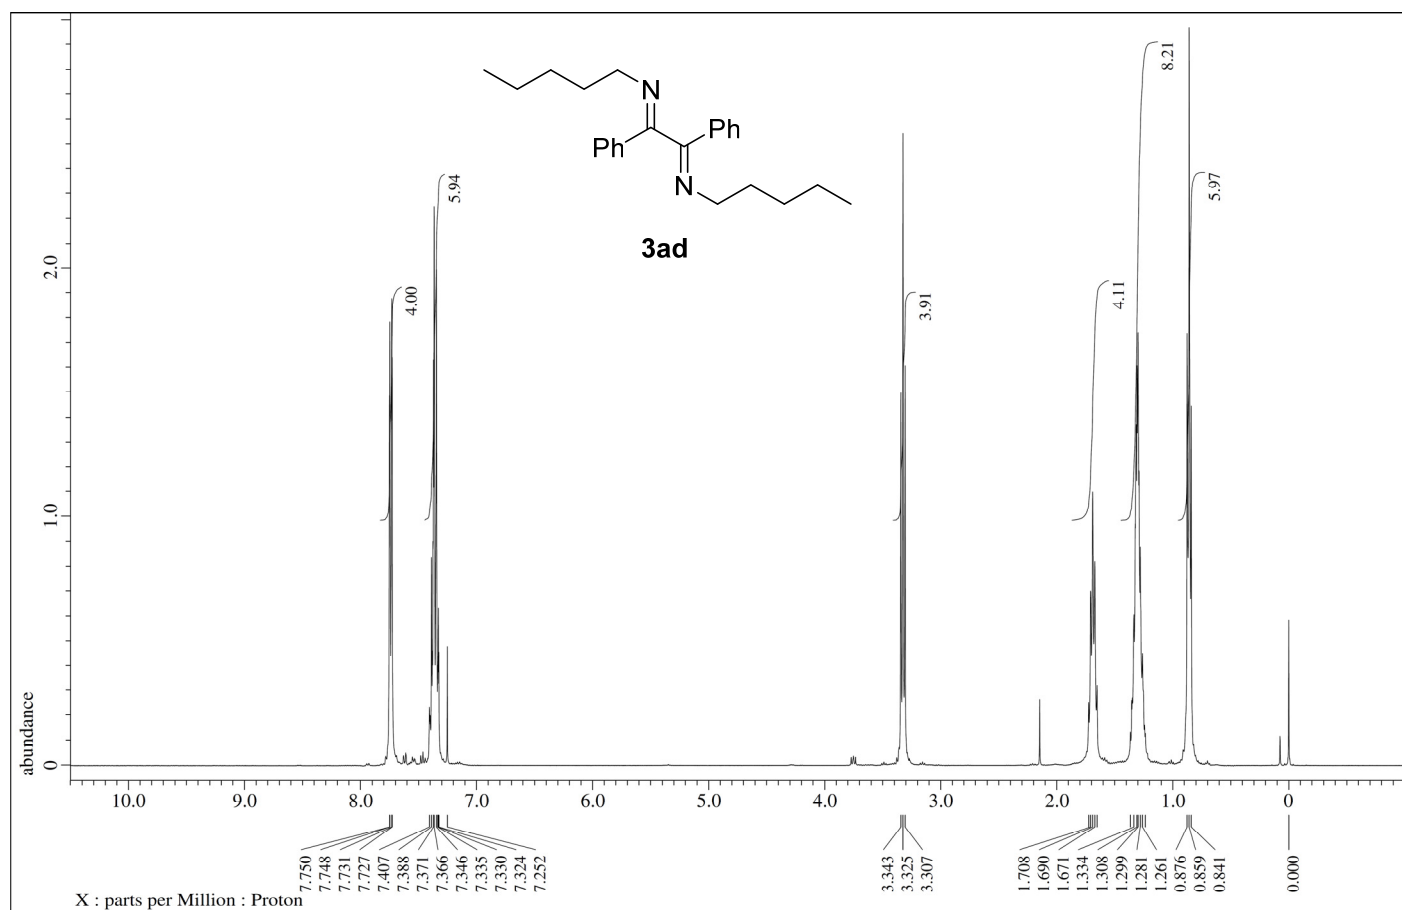

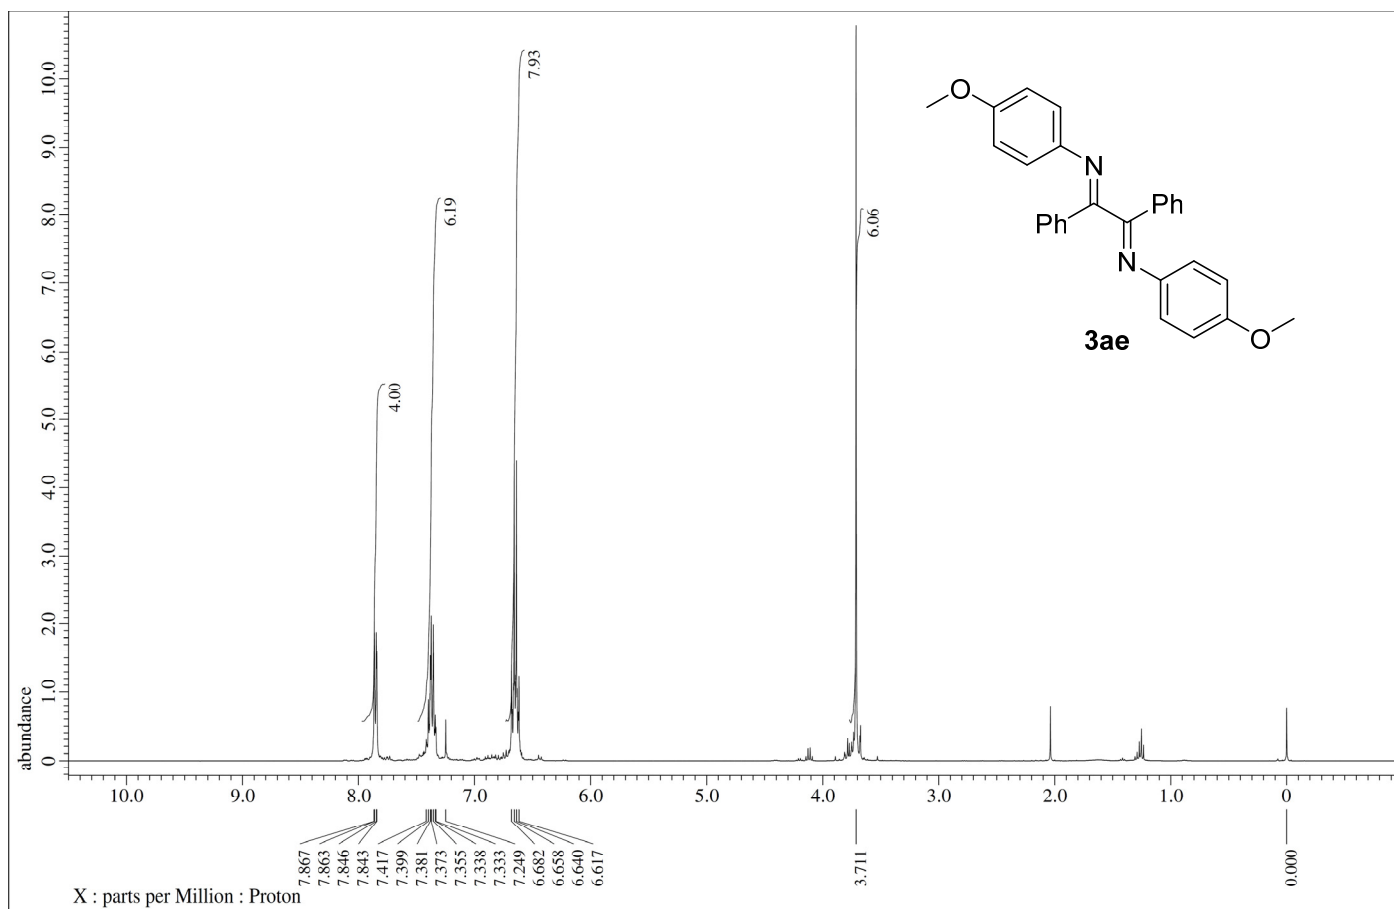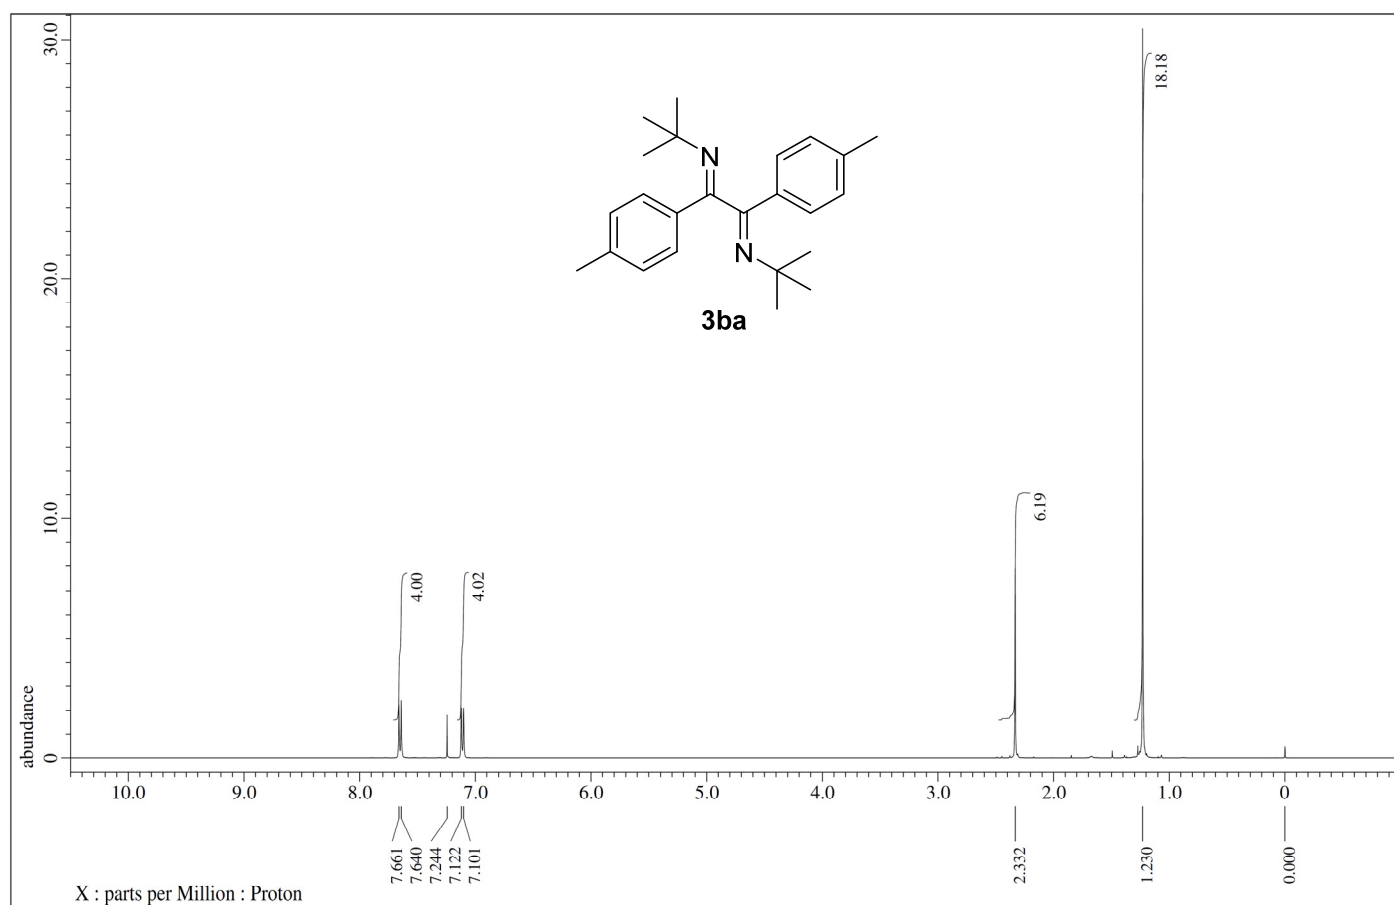

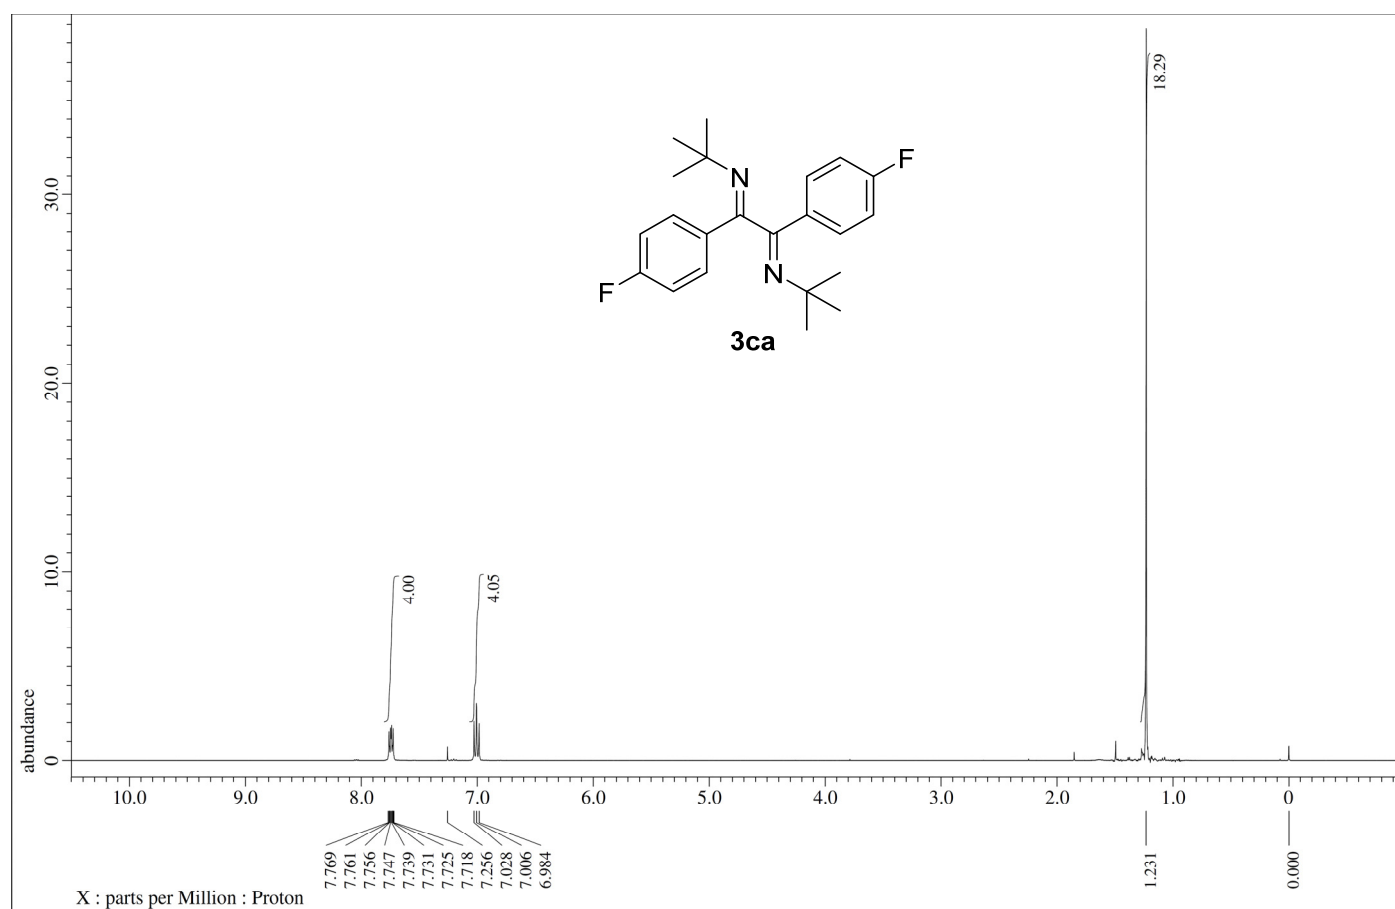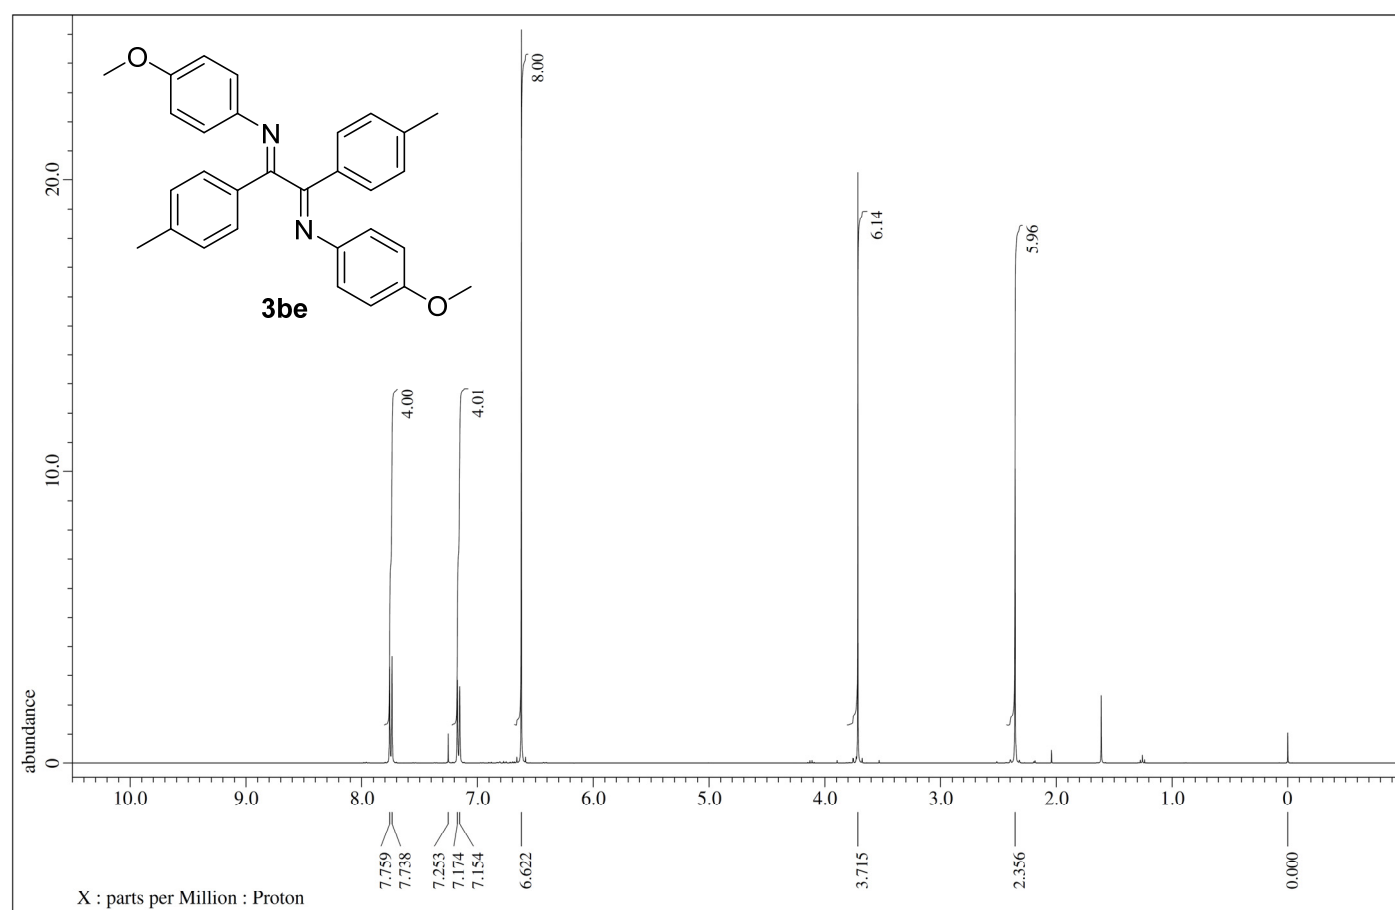

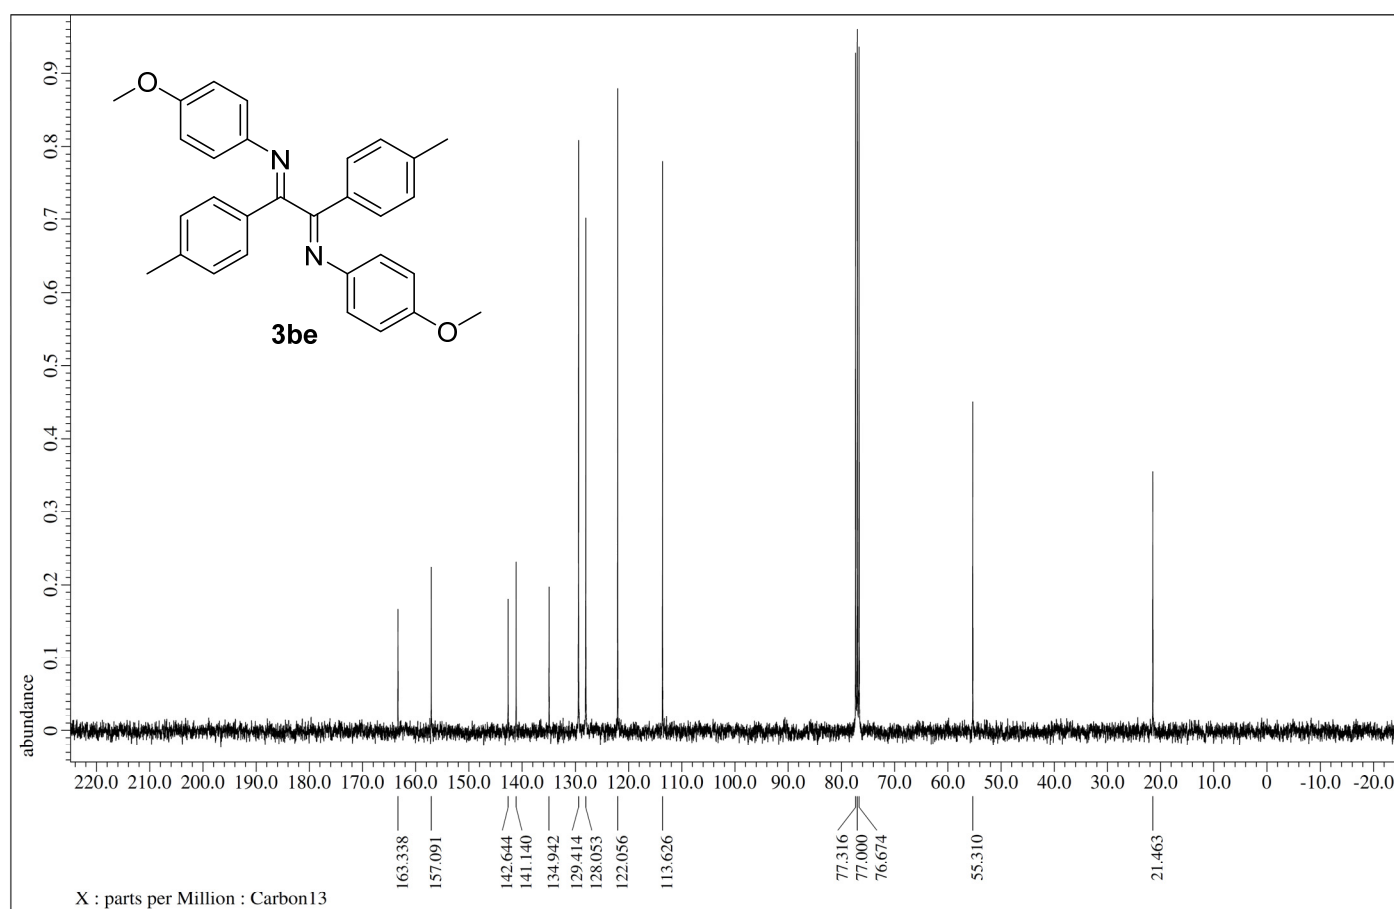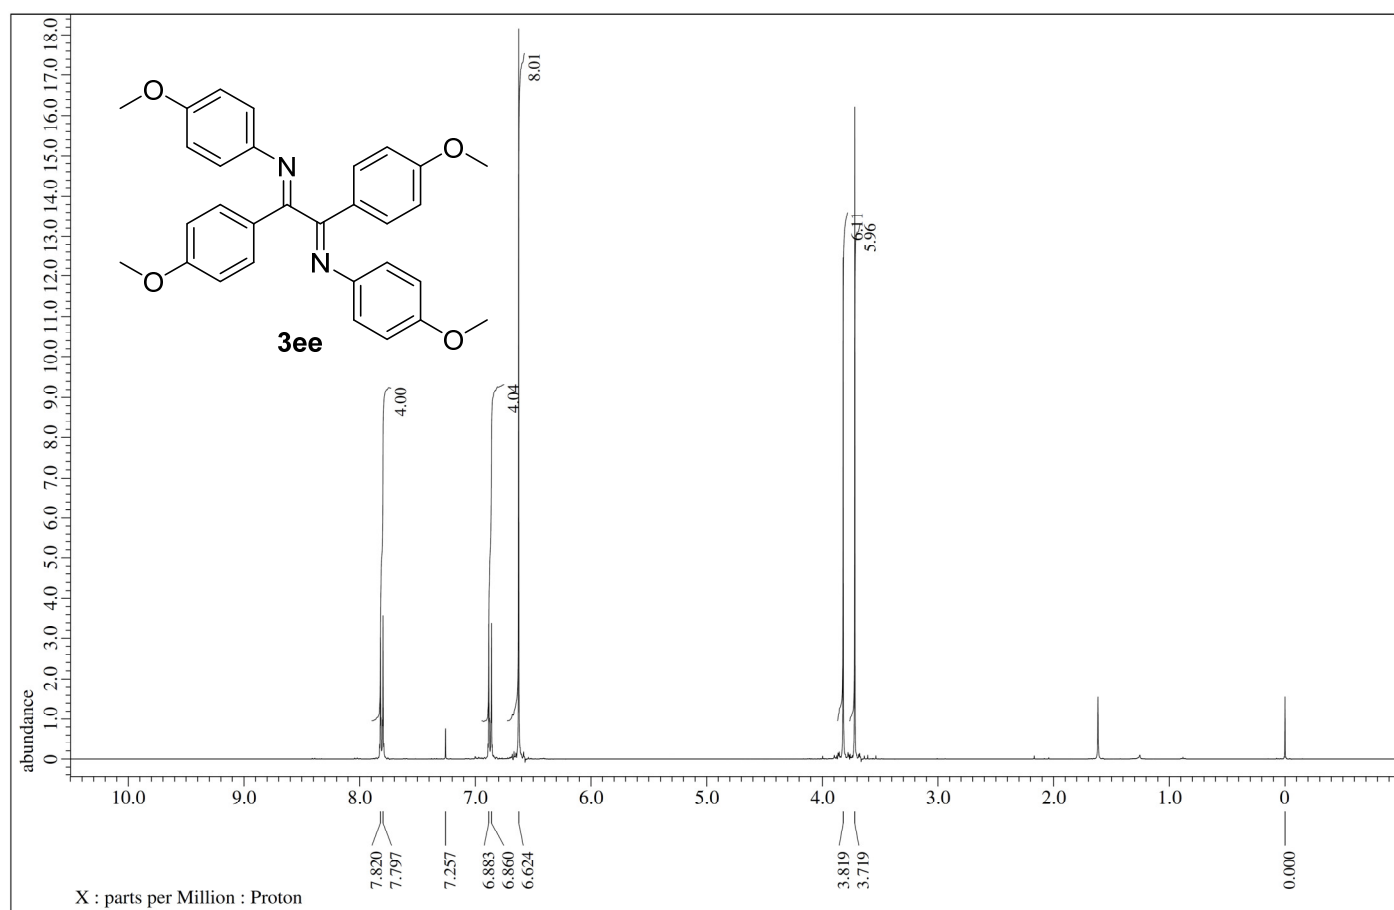

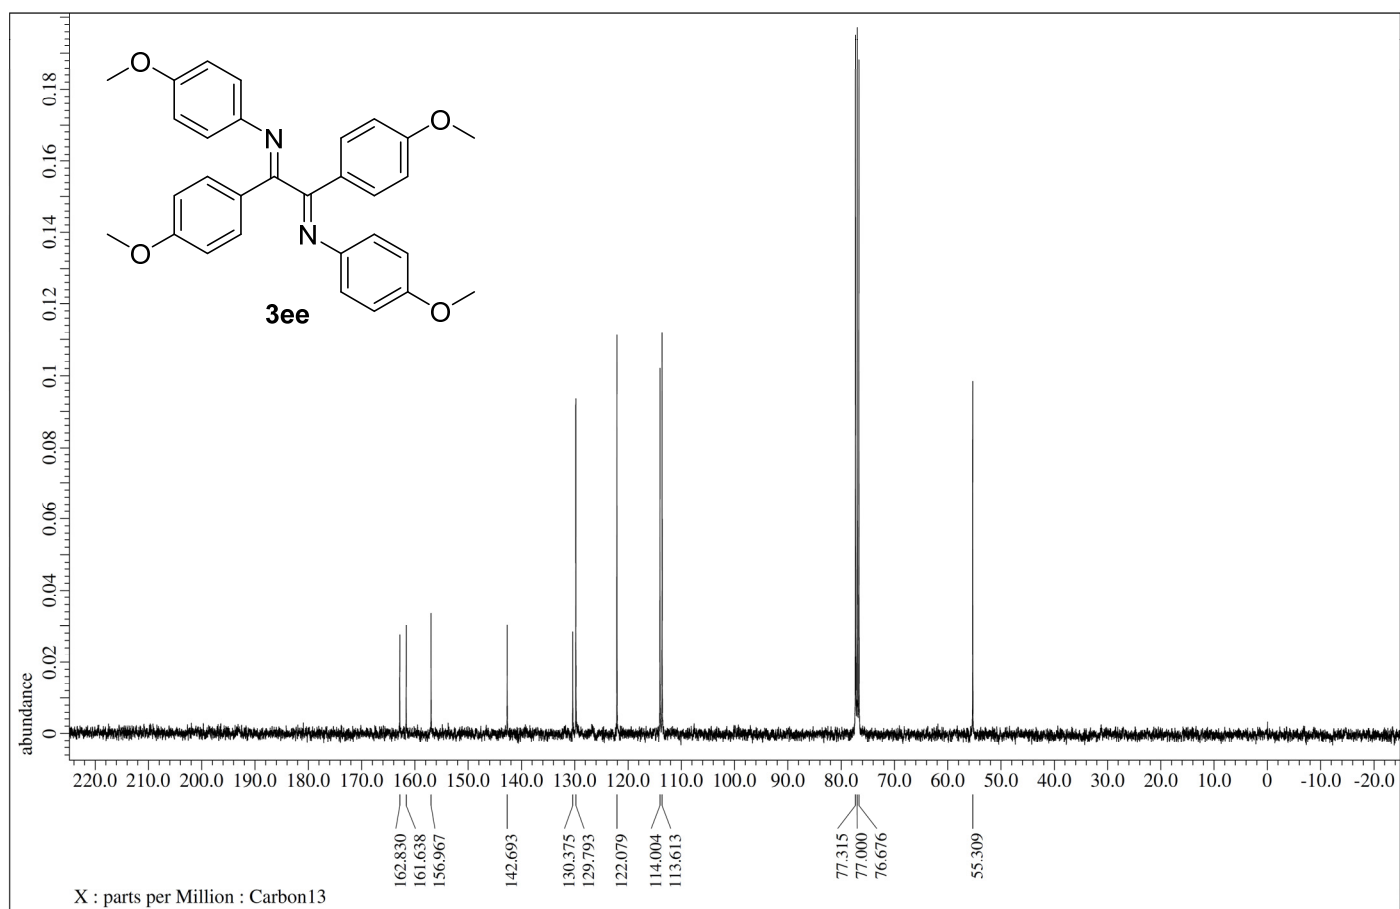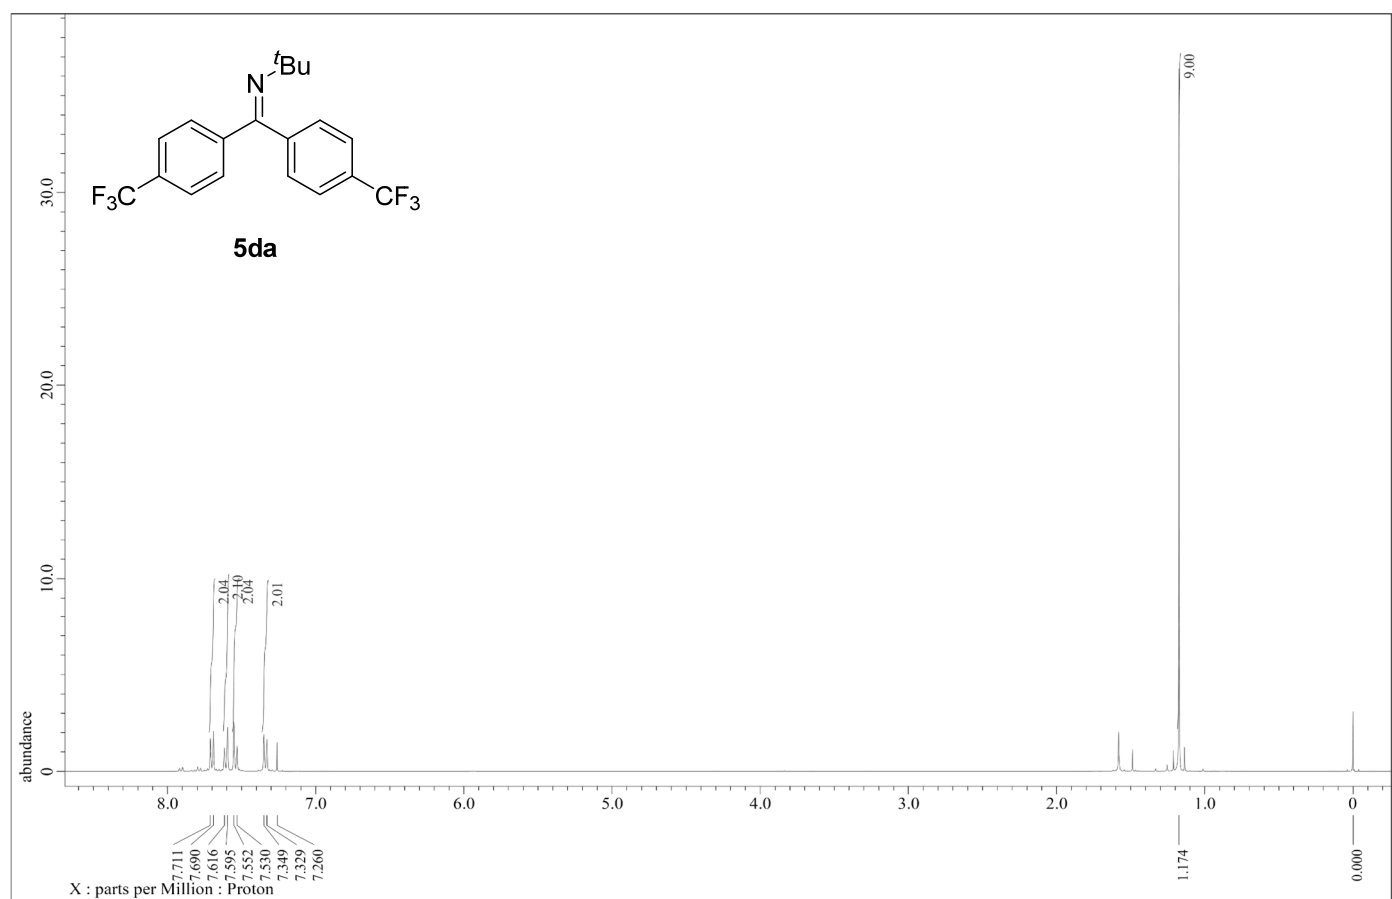

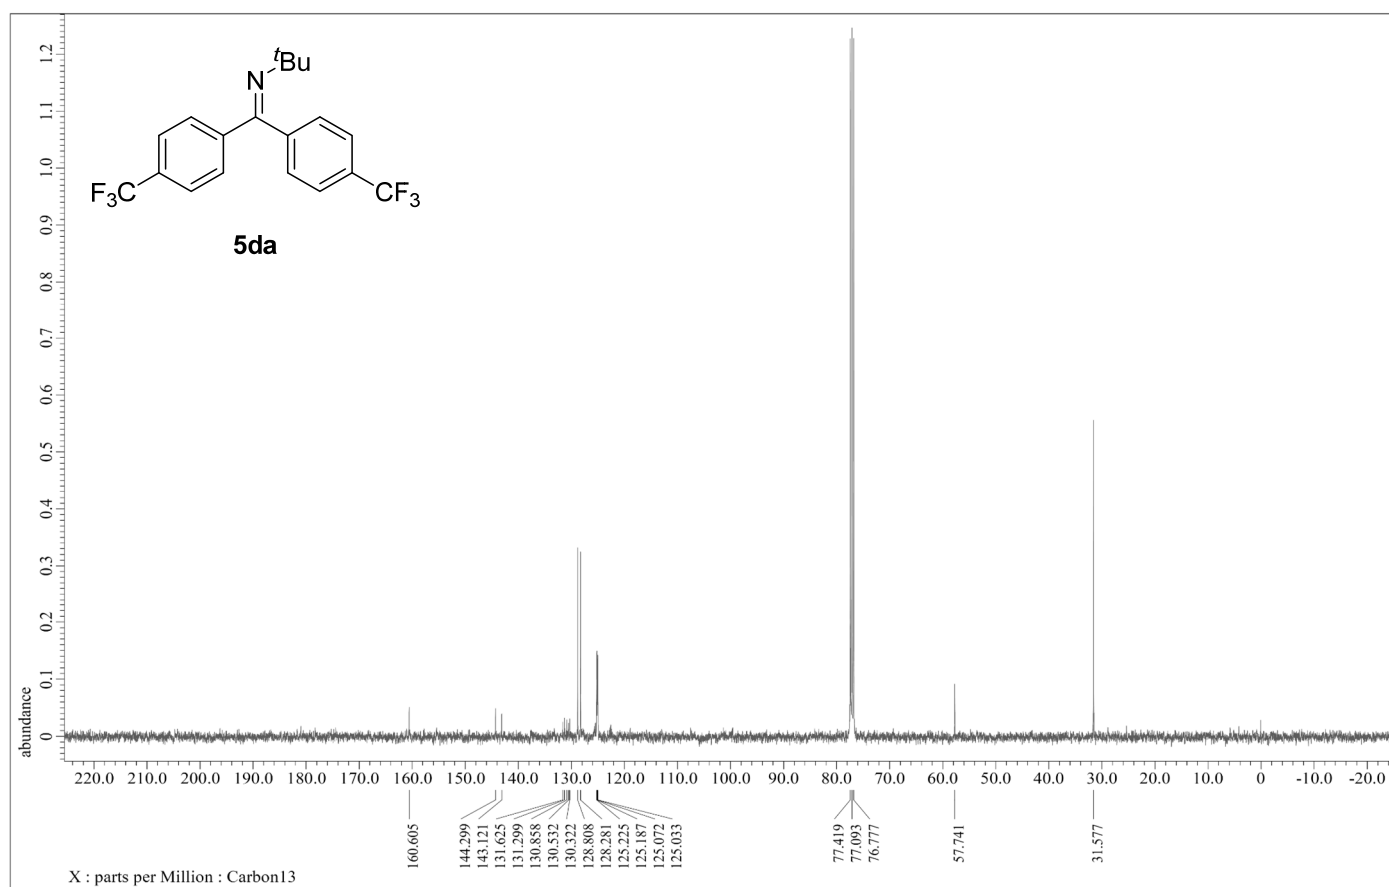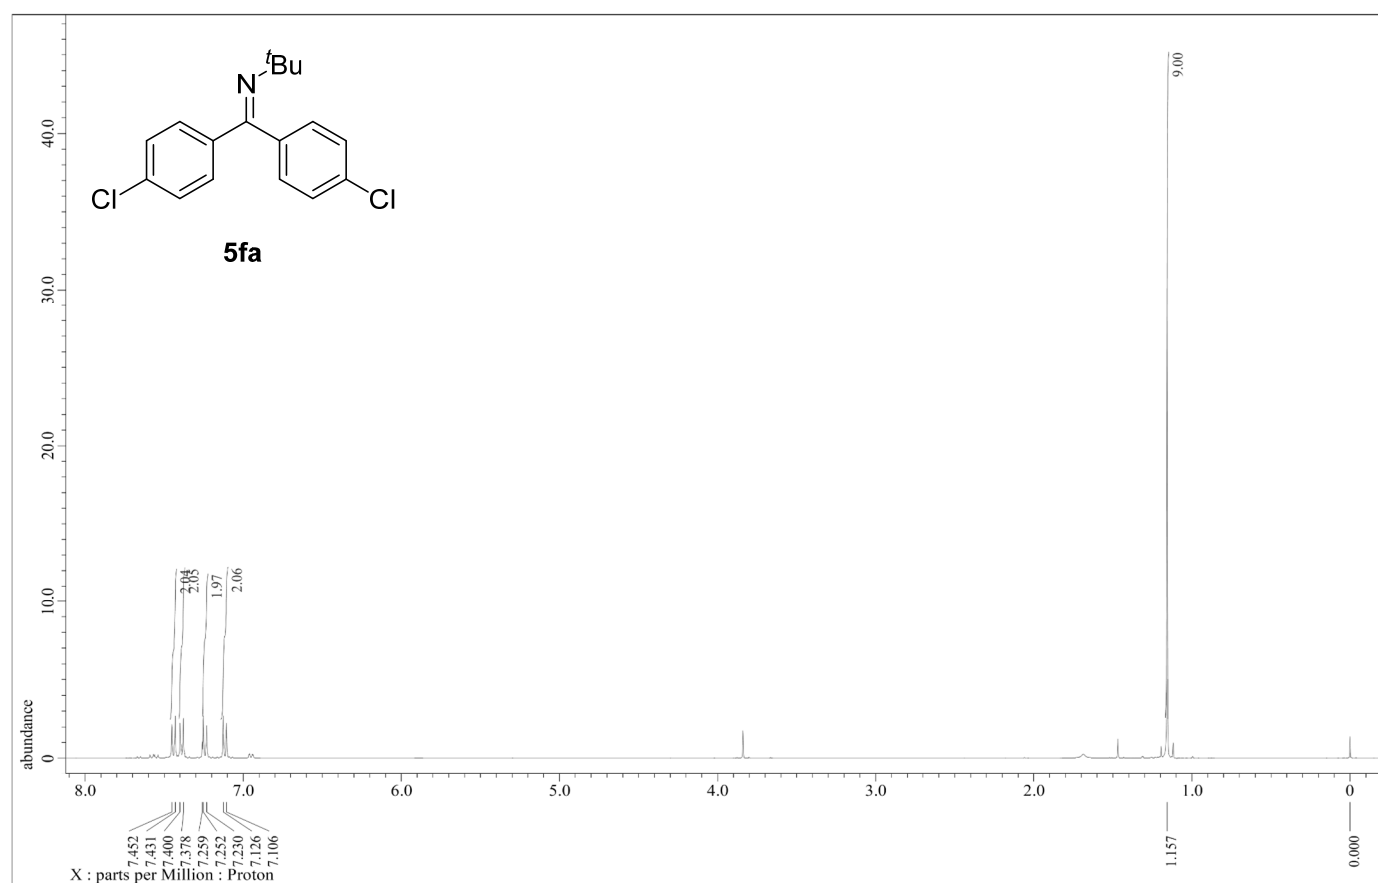



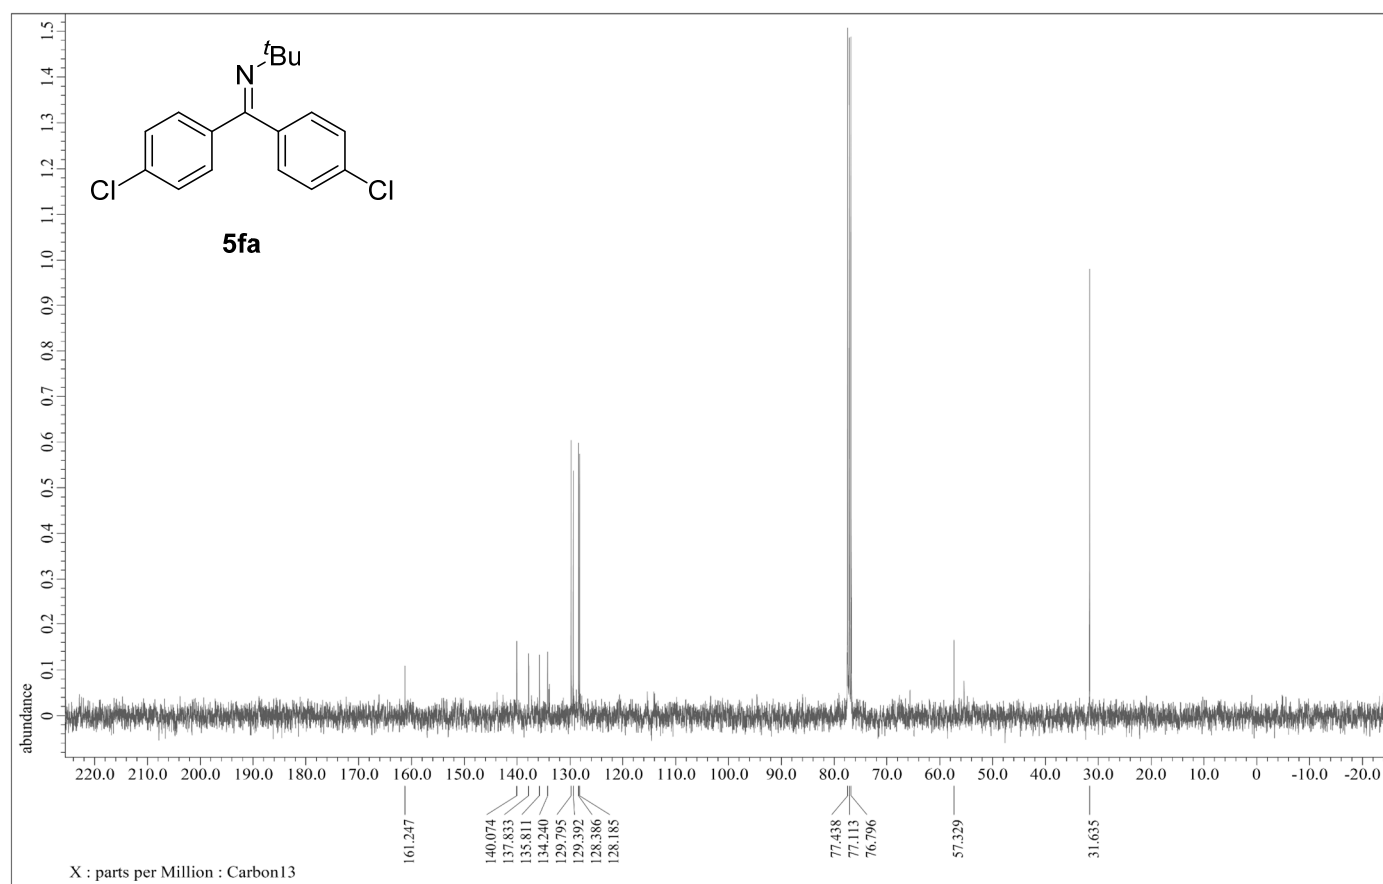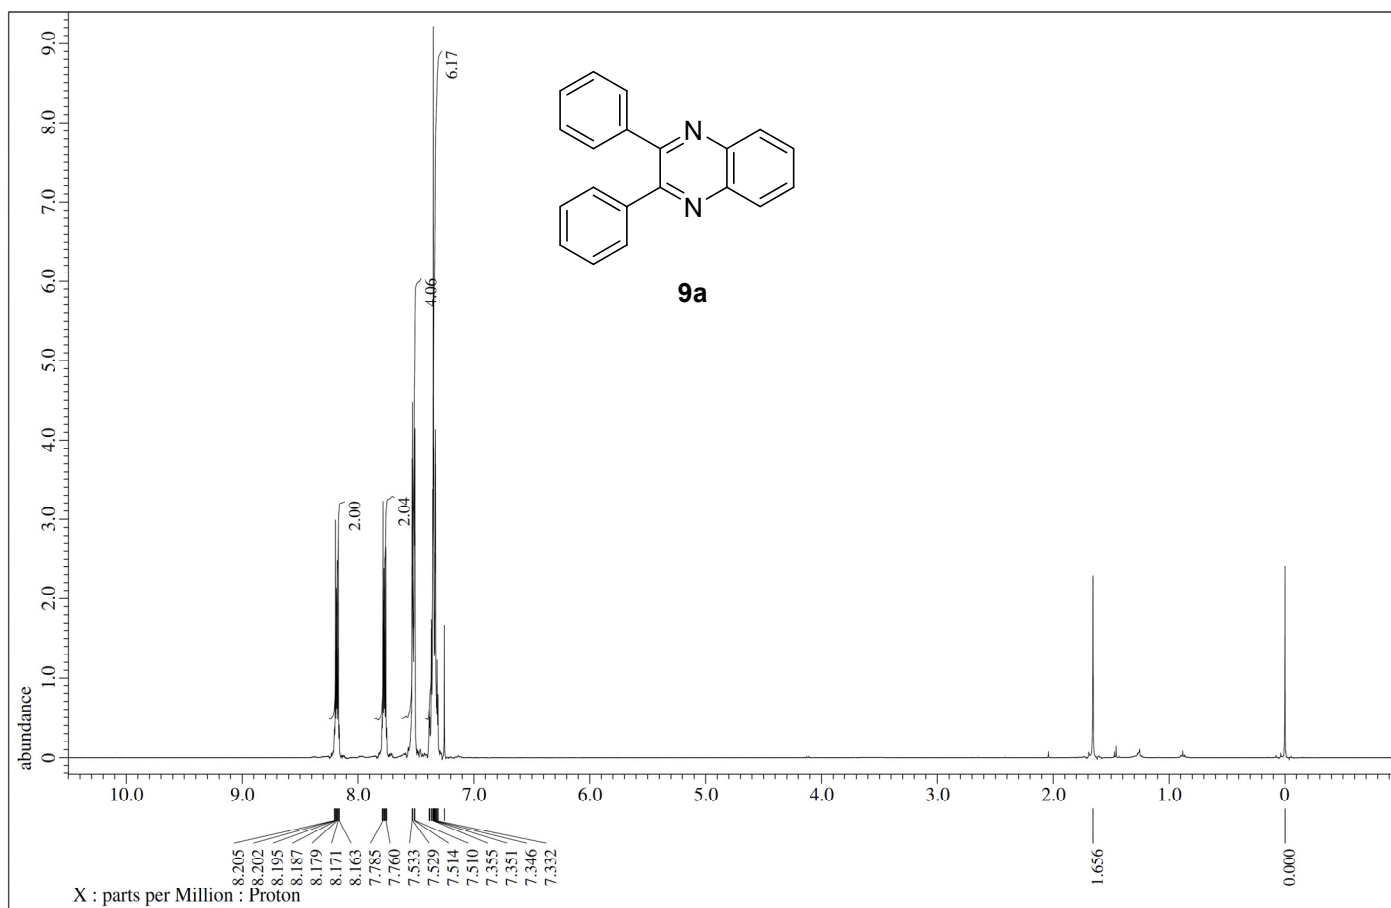

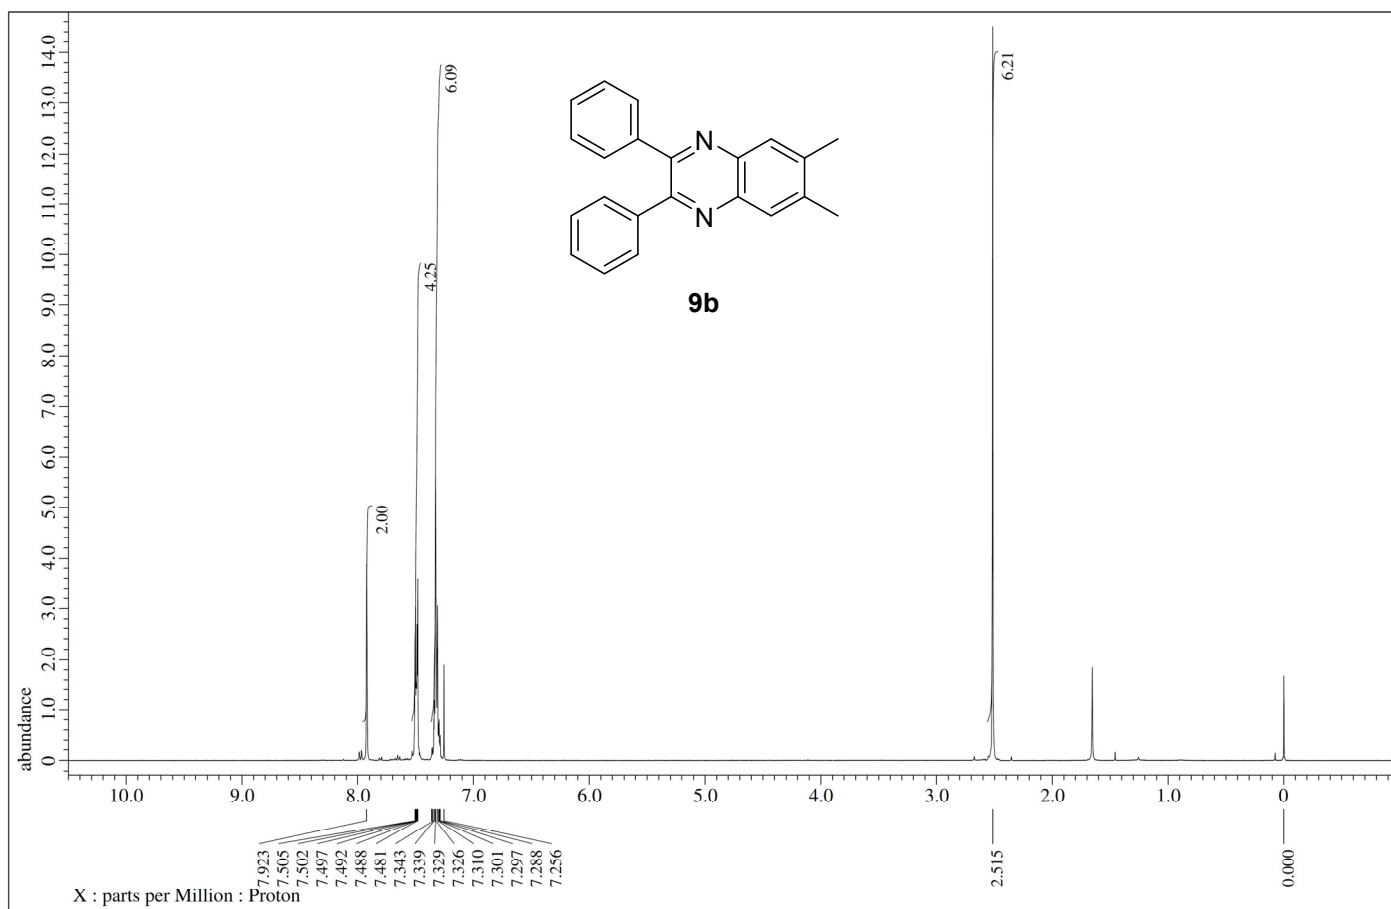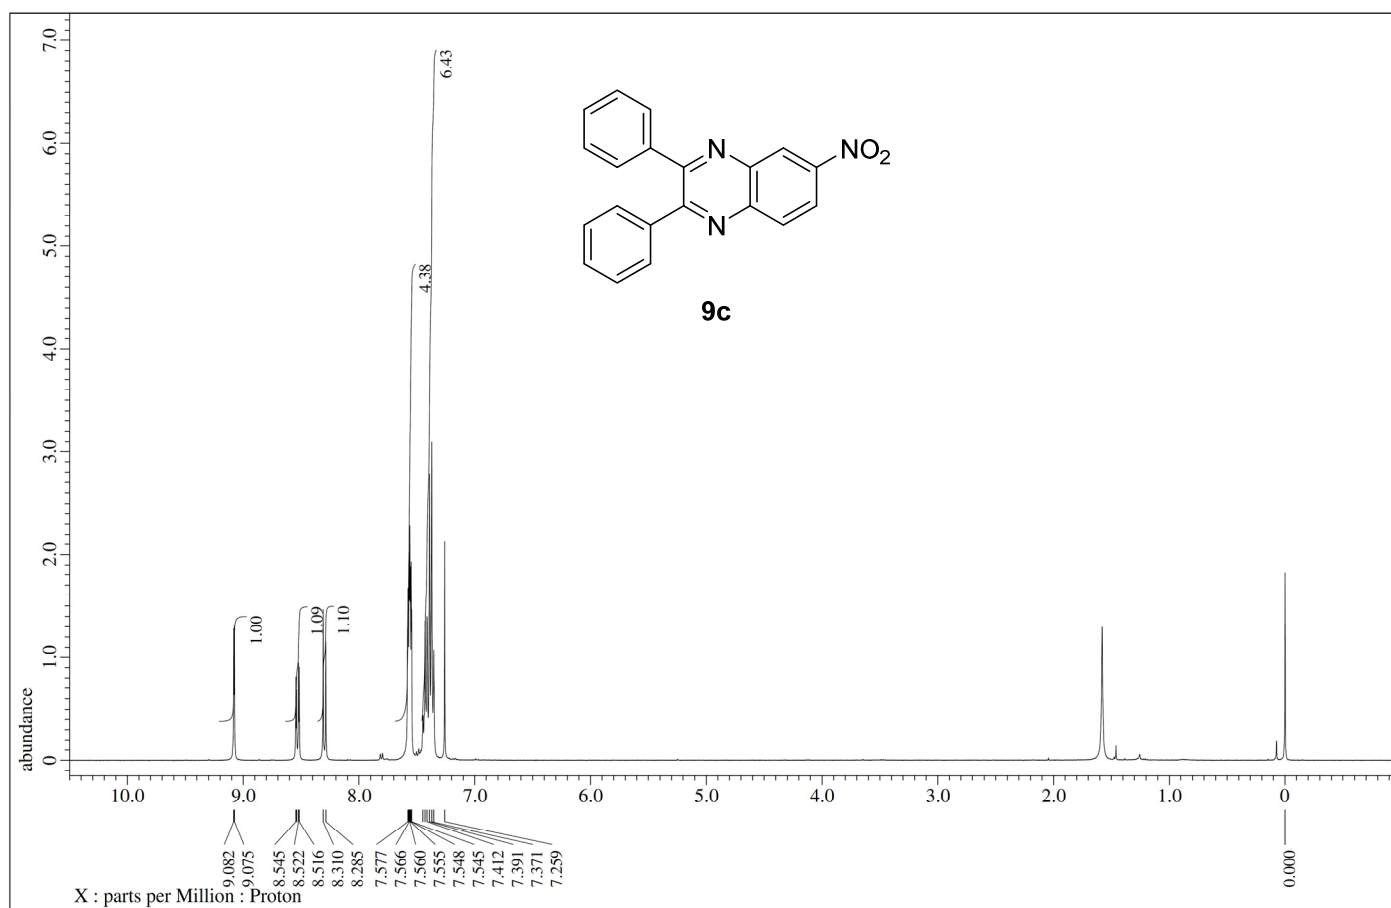

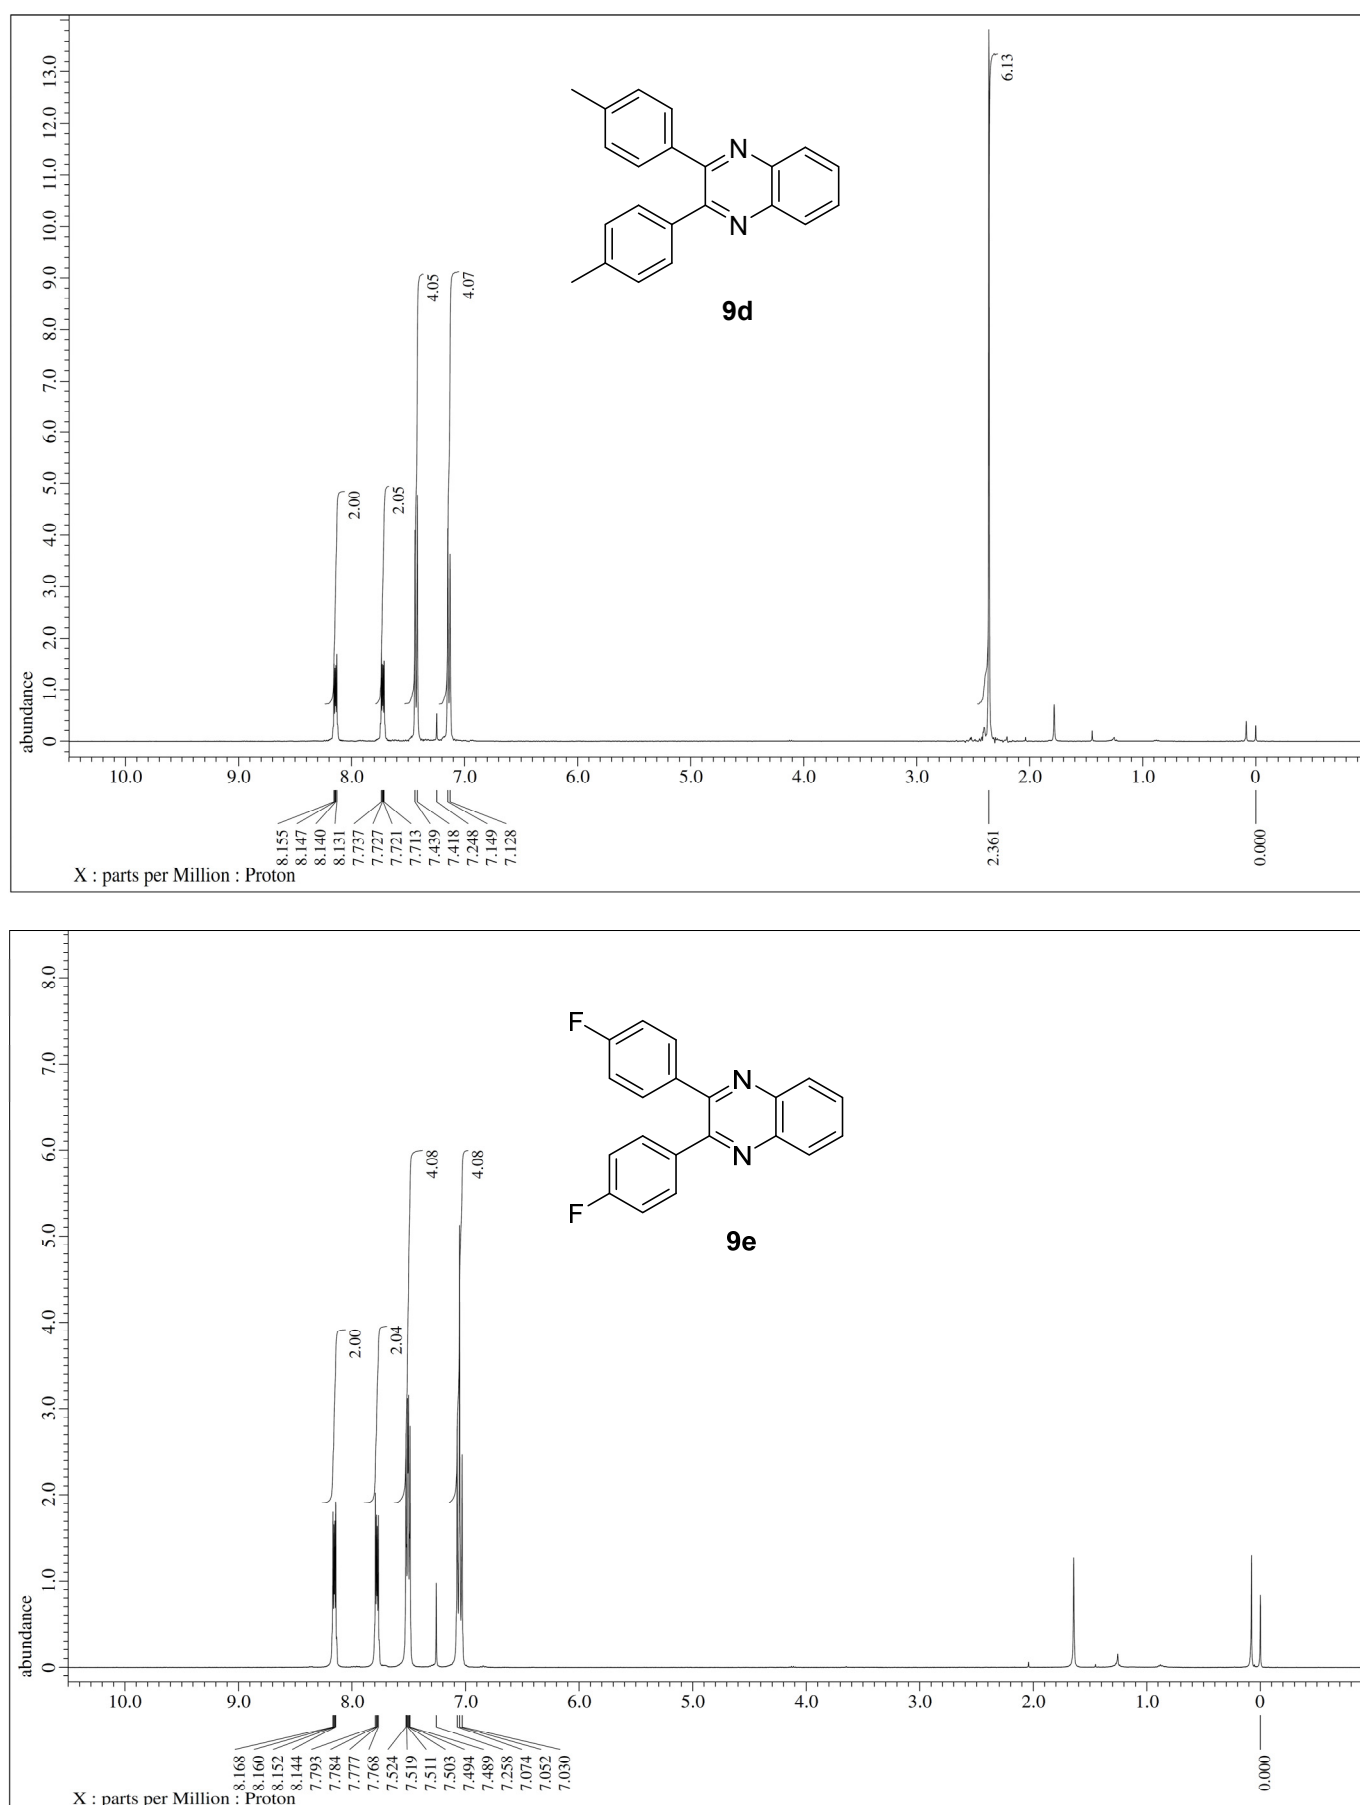Figure S1. Copies of  $^1\text{H}$  and  $^{13}\text{C}\{^1\text{H}\}$  NMR spectra.
